# Supplementary material for: Biomass-derived porous graphene for electrochemical sensing of dopamine
Source: Royal Society of Chemistry journal article supplement (doi:10.1039/d1ra00735a), 2021-01-01
Supplement: d1ra00735a1.pdf [file d1ra00735a1.pdf]

## Supporting Information

### **Biomass-derived Porous Graphene for Electrochemical Sensing of Dopamine**

Faisal Mahmood <sup>a,b</sup>, Yisheng Sun <sup>a</sup>, , Caixia Wan <sup>a,\*</sup>

<sup>a</sup> Department of Biomedical, Biological, and Chemical Engineering, University of Missouri,

Columbia 65211, USA

<sup>b</sup> Department of Energy Systems Engineering, University of Agriculture Faisalabad, Faisalabad

38000, Pakistan

\*Corresponding author: Phone: +1 573 884 7882; Fax: +1 573 884 5650; E-mail:

[wanca@missouri.edu](mailto:wanca@missouri.edu)

Number of Pages: 3

Number of Figures: 2

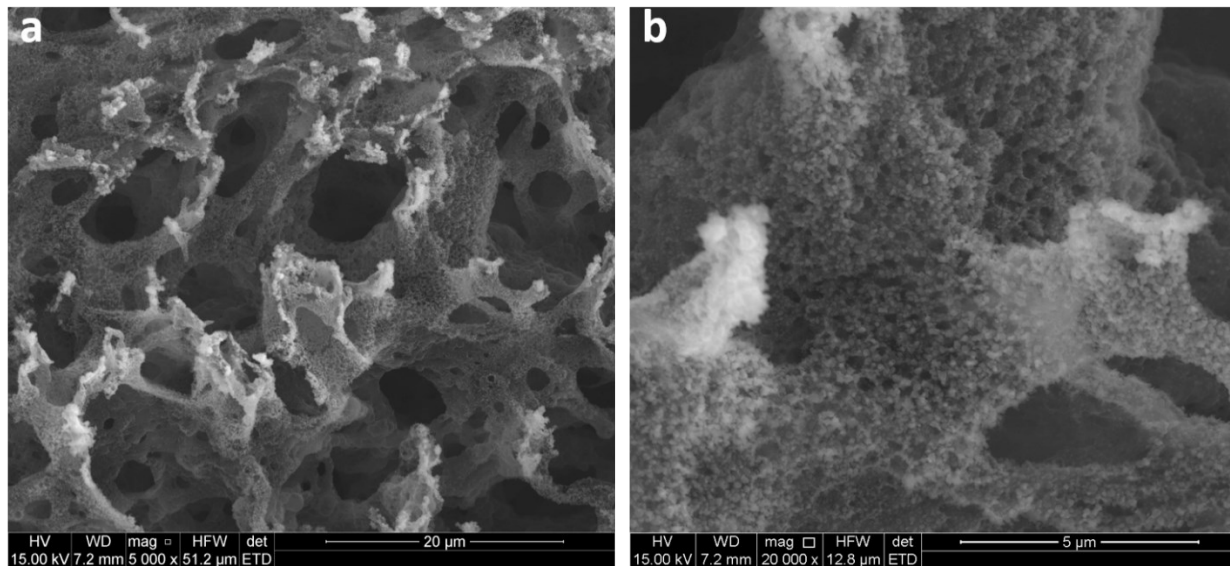

**Fig. S1** SEM images of LIG-70 (1:5) representing 3D porous carbon network with mesopores and macropores. LIG-70 (1:5) represents LIG derived from the CNF/KL (1:5) film at 70% laser power.

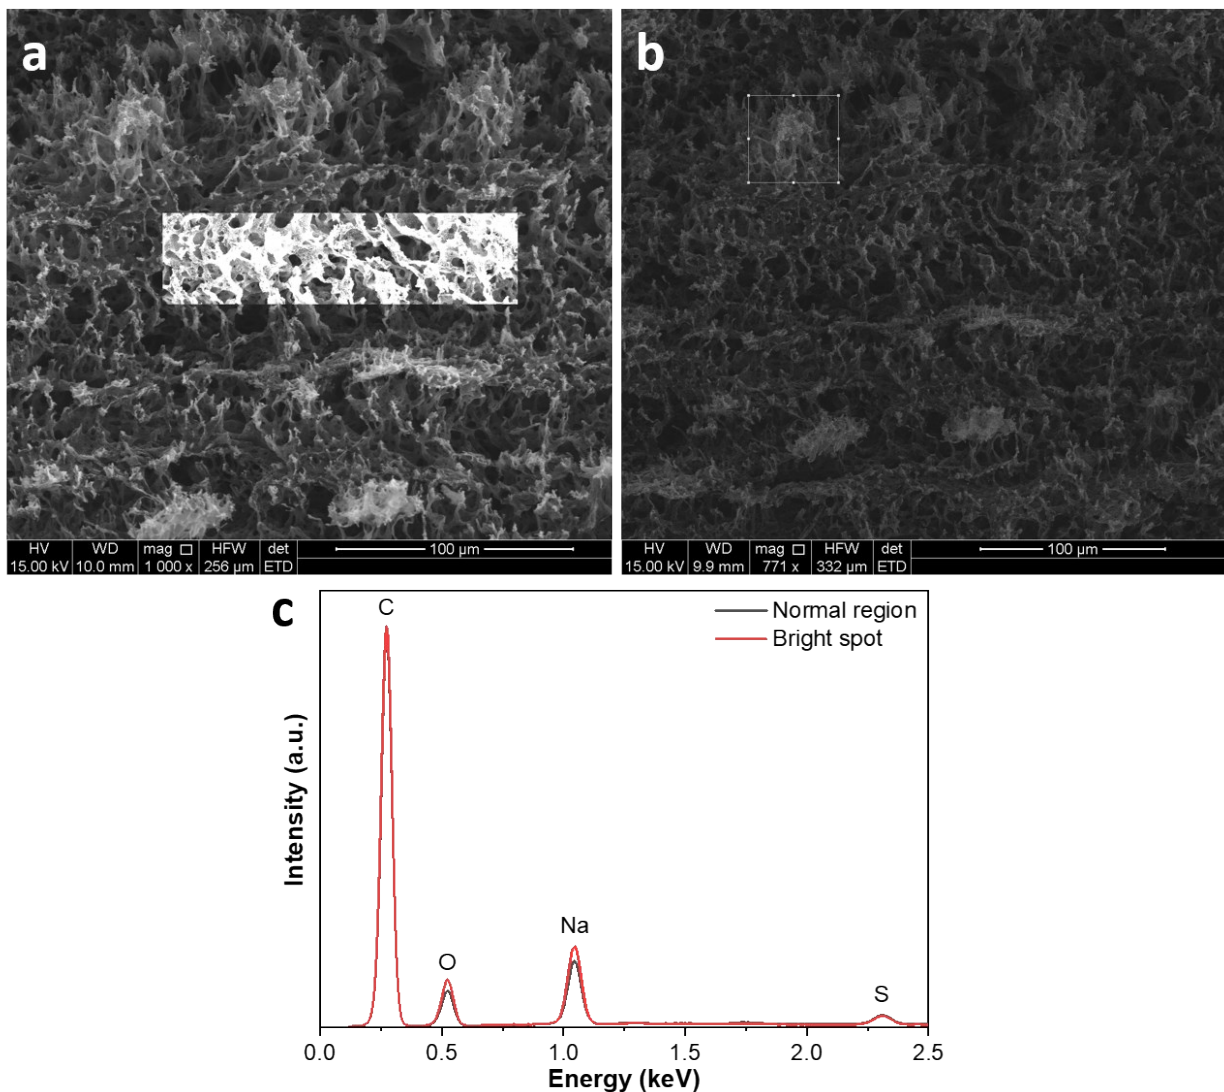

**Fig. S2** EDS analysis of LIG-70 (1:5). (a) Highlighted area representing a normal region for EDS analysis. (b) Square displaying a bright spot for EDS analysis. (c) Plot depicting the elemental compositions for both the normal region and bright spot. LIG-70 (1:5) represents LIG derived from the CNF/KL (1:5) film at 70% laser power.
